# Supplementary material for: Hydrogen bond regulating in hydrogel electrolytes for enhancing the antifreeze ability of a flexible zinc-ion hybrid supercapacitor
Source: Royal Society of Chemistry journal article supplement (doi:10.1039/d3se00163f), 2023-01-01
Supplement: d3se00163f4.pdf [file d3se00163f4.pdf]

## Supporting Information

### Hydrogen bond regulating in hydrogel electrolytes for enhancing the antifreeze ability of flexible zinc-ion hybrid supercapacitor

Yueyue Bao,<sup>a</sup> Lu Han,<sup>b\*</sup> Wenwu Peng,<sup>a</sup> Zhongli Yang,<sup>a</sup> Jiaqi Yang,<sup>a</sup> Zhengxiao Ji,<sup>a</sup> Min Xu,<sup>a\*</sup> Likun Pan<sup>a\*</sup>

<sup>a</sup> Shanghai Key Laboratory of Magnetic Resonance, School of Physics and Electronic Science, East China Normal University, Shanghai 200241, P. R. China

<sup>b</sup> Key Laboratory of Spin Electron and Nanomaterial of Anhui Higher Education Institutes, Suzhou University, Suzhou 234000, P. R. China.

\*Corresponding authors

Email: [lkpan@phy.ecnu.edu.cn](mailto:lkpan@phy.ecnu.edu.cn) (Likun Pan); [xumin@phy.ecnu.edu.cn](mailto:xumin@phy.ecnu.edu.cn) (Min Xu); 982563331@qq.com (Han Lu)

#### Materials

PVA (average polymerization degree:  $1700 \pm 50$ , alcoholysis:  $\geq 88\%$ ) was purchased from Greagent, cellulose nanofibrils (CNFs, by crushing cellulose paperboard with grinder). TEMPO (2,2,6,6-tetramethylpiperidinoxy) and dimethyl sulfoxide (DMSO, purity: 99.7%) was purchased from Adamas.  $\text{ZnSO}_4 \cdot 7\text{H}_2\text{O}$  was purchased from Aladdin Chemical Reagent Co. Raw AC material was purchased from Kuraray (Shanghai) Co., Ltd. Zinc metal foil (0.08 mm) was supplied by Hebei

Tengfeng Metal Material Co., Ltd. China. Carbon back was produced by Sinopharm Chemical Reagent Co., Ltd.

## **Characterizations**

The tensile properties of hydrogel were studied by a universal tensile testing machine (INSTRON, model 5943, 1 kN, America) at 25 °C with a stretching speed of 50 mm min<sup>-1</sup>. The Fourier transform infrared spectroscopy (FTIR) test was performed on Nicolet-Nexus 670 spectrophotometer at room temperature. The dried gels were triturated with KBr in the ratio of 1:100. The samples were ground into powder to analyze their XRD patterns using a Bruker-D8 Advance diffractometer. The hydrogel was shaped into a cylinder with a bottom circle diameter of 1 mm and a height of 30 mm, and the morphologies and structures and the energy-dispersive X-ray spectrum (EDS) of the samples were observed using a scanning electron microscope (SEM, Hitachi S-4800, Japan). The surface composition of the hydrogel was estimated by X-ray photoelectron spectroscopy (XPS, AXIS SUPEA, Kratos Corp) by studying the C 1s, C 2s, O 1s peaks. Nonmonochromatic Al K $\alpha$  radiation was used and created by a power of 220 W at a pressure of ca. 10<sup>-7</sup> Pa in the chamber.

## **Electrochemical measurements**

AC cathode was prepared by mixing 80 wt% AC, 10 wt% carbon black and 10 wt% PVDF in an NMP solvent, and then the mixture was coated onto graphite paper, which was dried at 60 °C in constant temperature oven. Typically, each working electrode comprises an exposed area of 1 × 2 cm<sup>2</sup> with a mass loading of 5 mg. Zn metal foil was directly used as anode, which should be polished with finegrained sandpaper to avoid being oxidized. AC//PVA/CNF/DMSO (PCD)-Zn hydrogel//Zn

FZHSC was assembled with PCD hydrogel electrolyte, which also acted as a separator of cathode and anode. Cyclic voltammetry (CV) and galvanostatic charge-discharge (GCD) tests were applied to evaluate the electrochemical behaviors of FZHSCs using an electrochemical workstation (Autolab PGSTAT302N). Electrochemical impedance spectroscopy (EIS) was tested at the electrochemical workstation (Autolab PGSTAT302N). The cycling stability measurement of FZHSC was carried out on a LAND battery-testing instrument with a sweep charge and discharge rate at  $3 \text{ A g}^{-1}$  for 5000 cycles.

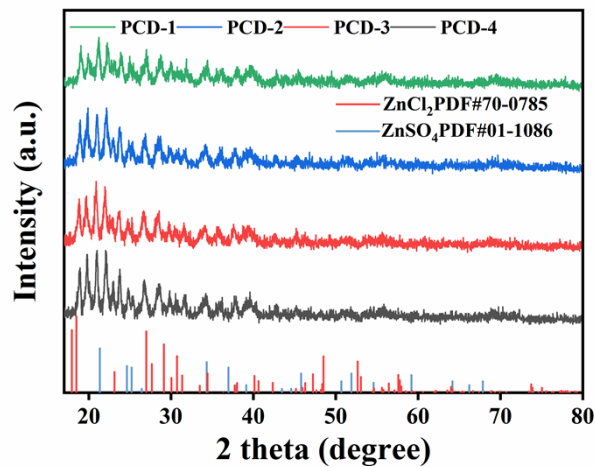

**Figure S1.** XRD patterns of PCD-1, PCD-2, PCD-3 and PCD-4.

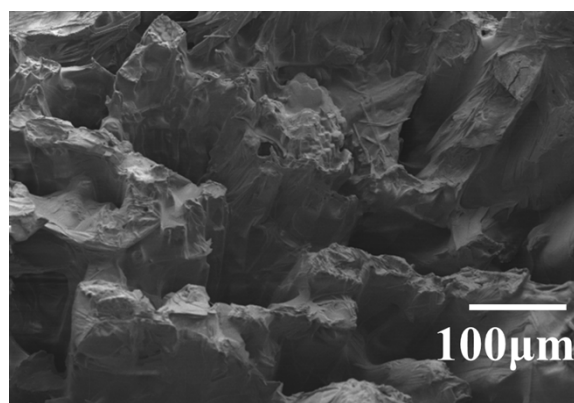

**Figure S2.** SEM images of PCD-4 at 100  $\mu\text{m}$  resolution.

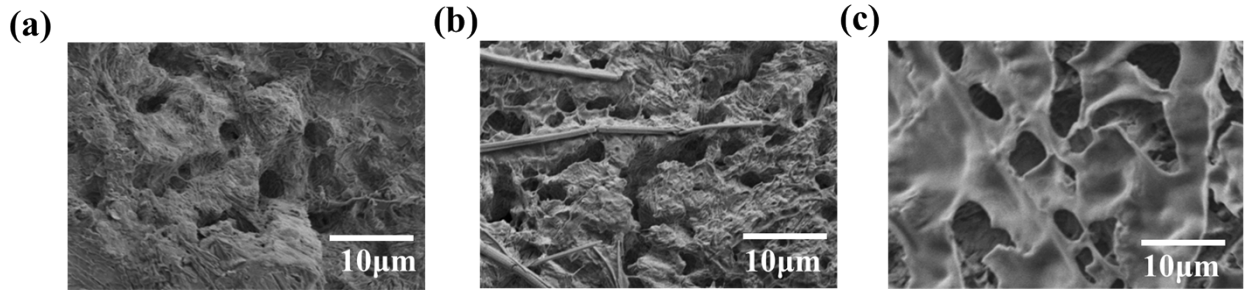

**Figure S3.** SEM images of (a) PCD-1, (b) PCD-2 and (c) PCD-3.

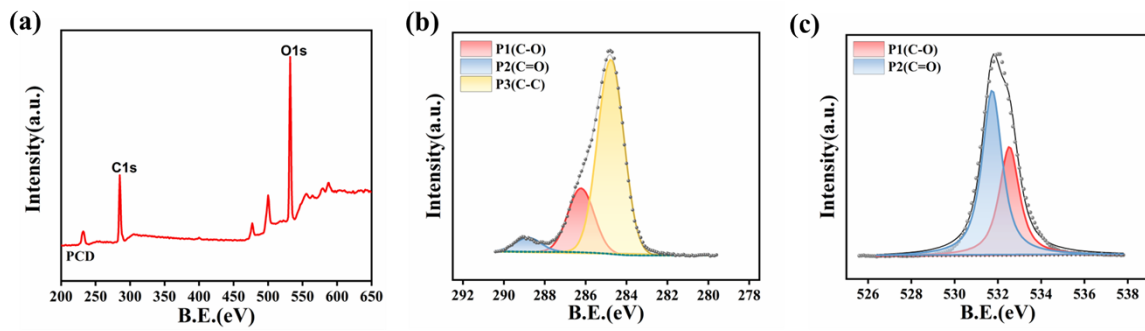

**Figure S4** (a) XPS spectrum of PCD-4 sample. (b-c) XPS C 1s, O 1s of PCD-4 hydrogel.

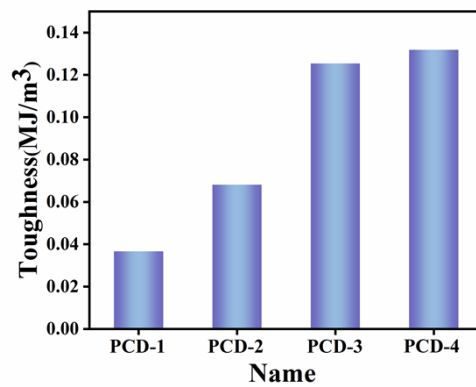

**Figure S5** Toughness of hydrogels with different DMSO contents.

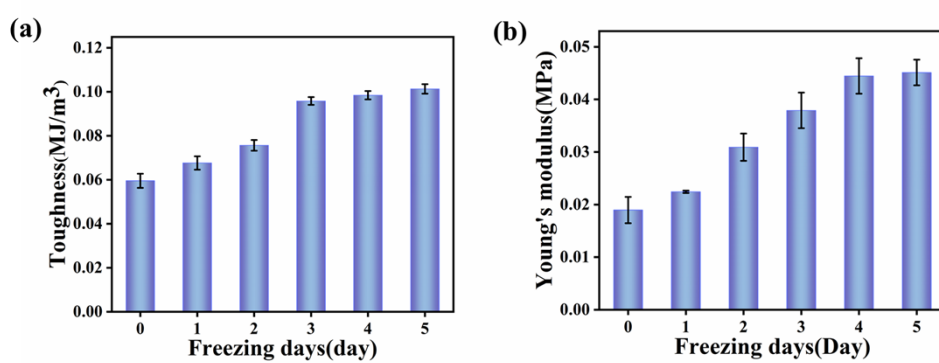

**Figure S6** (a) Toughness, and (b) Young's modulus of PCD-4 hydrogel formed in different freezing days.

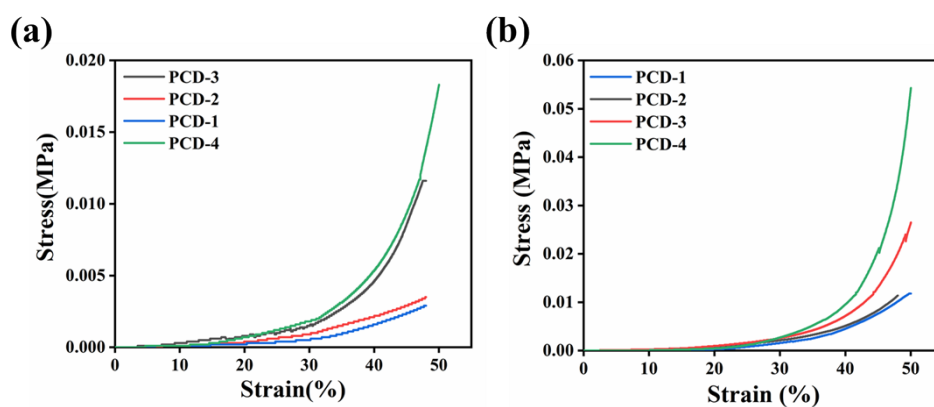

**Figure S7** Stress-strain curves of hydrogels with different DMSO contents at a compressing rate of 3 mm min<sup>-1</sup> at (a) room temperature and (b) -20 °C.

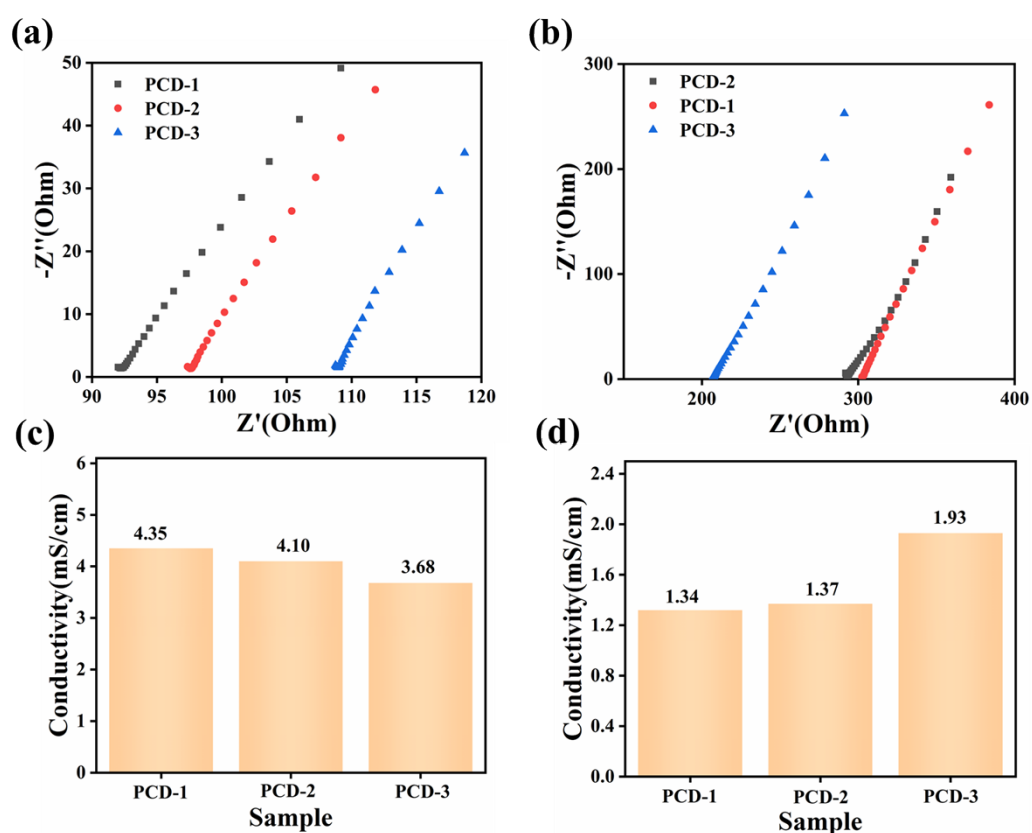

**Figure S8** Nyquist plot of PCD hydrogels with different contents of DMSO at (a) room temperature (25 °C) and (b) -20 °C. Ionic conductivity of PCD hydrogels with different contents of DMSO at (c) room temperature (25 °C) and (d) -20 °C.

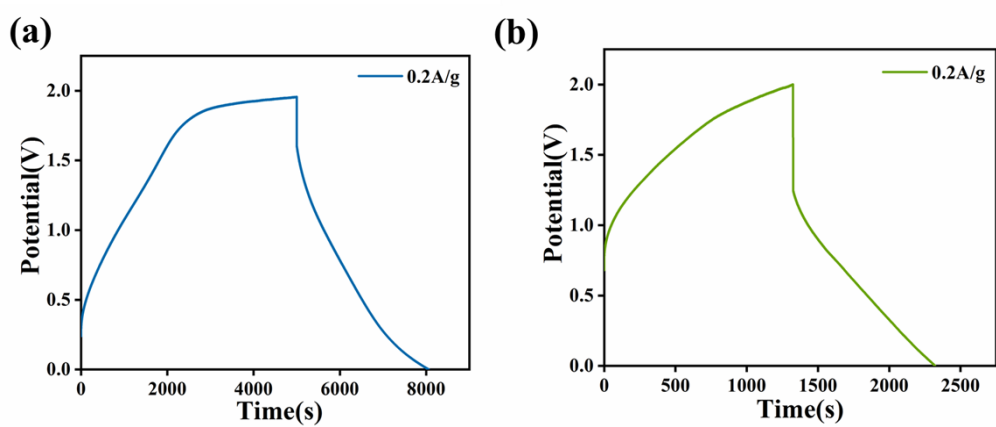

Figure S9 GCD curves at 0.2 A g<sup>-1</sup> in (a) room temperature (25 °C) and (b) -20 °C.

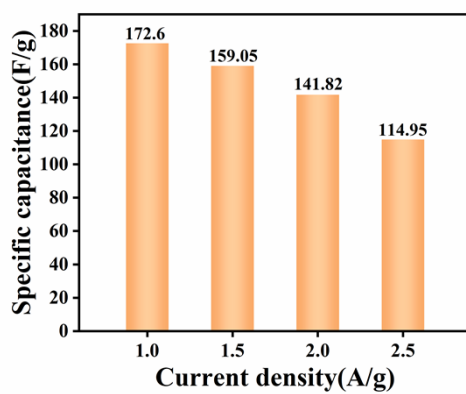

Figure S10 Specific capacity at current density of 1.0-2.5 A g<sup>-1</sup>.

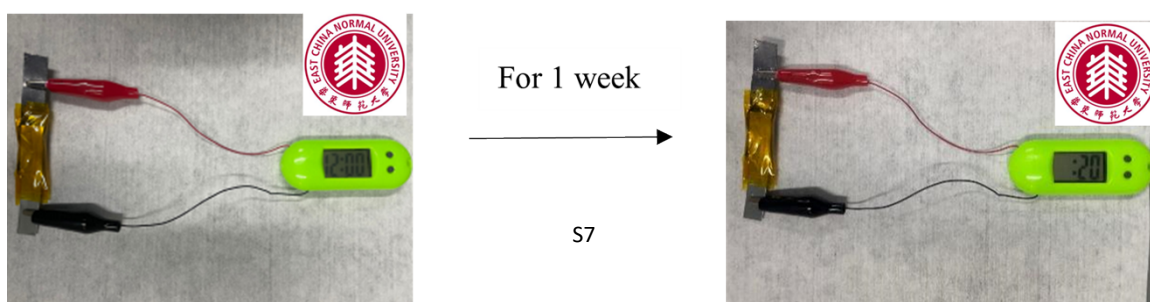

**Figure S11** The best optimized FZHSC (a) can power an electric watch and (b) work for one week.

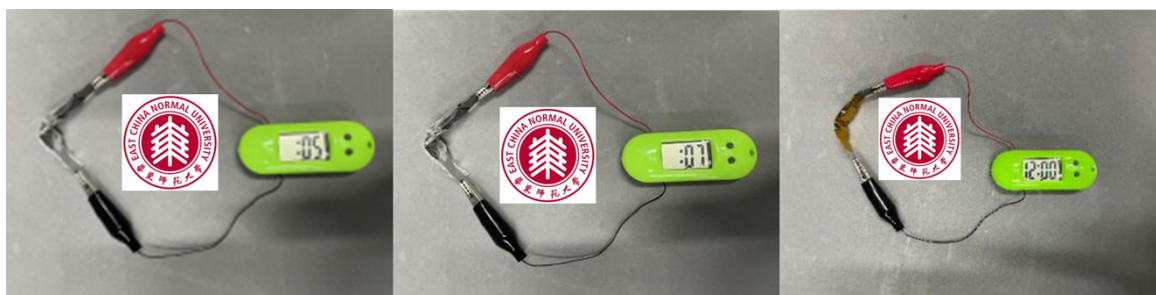

**Figure S12** The bending device can power a watch.

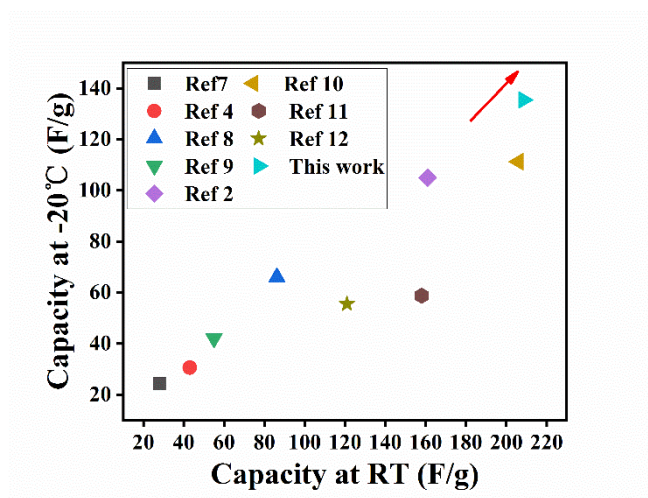

**Figure S13** Capacity of the present supercapacitor and other anti-freezing supercapacitors reported in previous works.

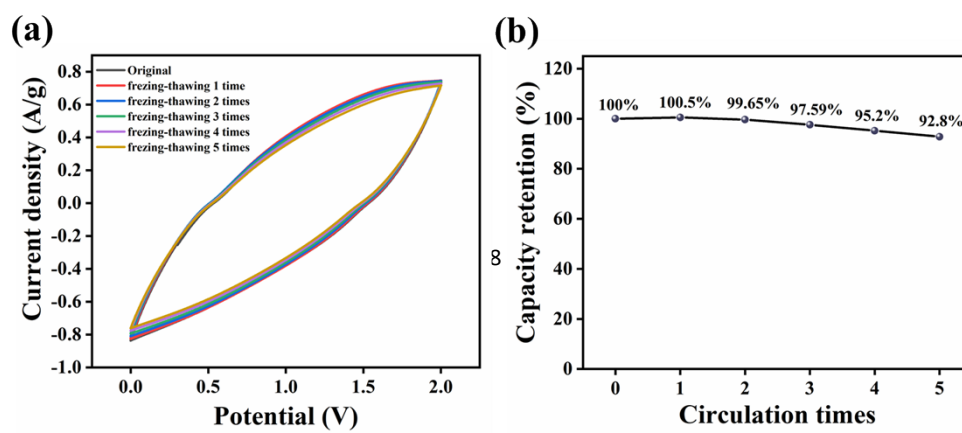



**Figure S14** (a) CV curves and (b) capacity retentions of FZHSC after repeated freezing and thawing.

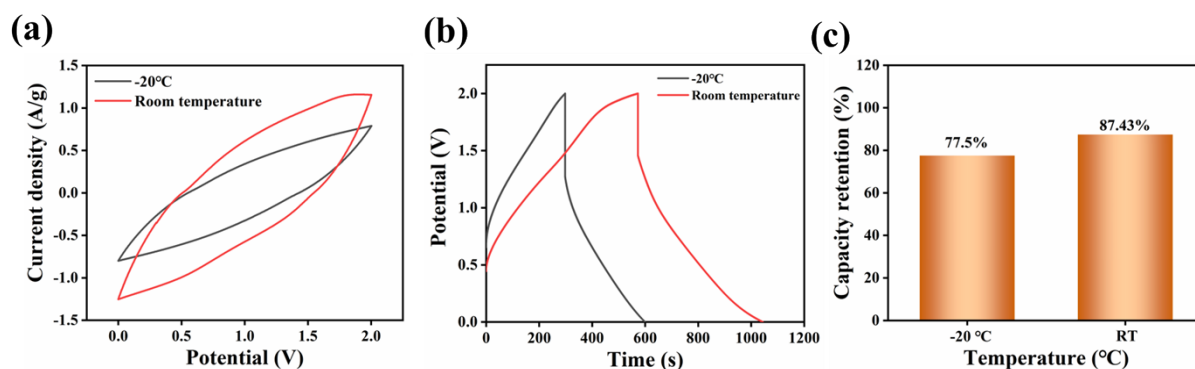

**Figure S15** (a) CV, (b) GCD curves and (c) capacity retentions of FZHSC at different temperatures after freezing for a week.

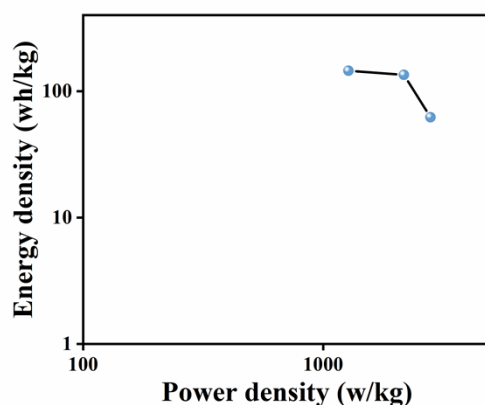

**Figure S16** Ragone plot of FZHSC at -20 °C.

**Table S1** The experimental ingredients and nomenclatures of the as-prepared hydrogels.

| Name  | H <sub>2</sub> O(g) | PVA(g) | CNF(g) | DMSO(g) | ZnSO <sub>4</sub> (g) |
|-------|---------------------|--------|--------|---------|-----------------------|
| PCD-1 | 11                  | 1.8    | 0.08   | 9       | 3.86(1.2M)            |
| PCD-2 | 10                  | 1.8    | 0.08   | 10      | 3.86(1.2M)            |

|       |   |     |      |    |            |
|-------|---|-----|------|----|------------|
| PCD-3 | 9 | 1.8 | 0.08 | 11 | 3.86(1.2M) |
| PCD-4 | 8 | 1.8 | 0.08 | 12 | 3.86(1.2M) |

**Table. S2** Comparison of the break elongation of PCD-4 hydrogel with previously reported hydrogel electrolytes.

| Gel electrolyte                                                | break elongation(%) | Ref       |
|----------------------------------------------------------------|---------------------|-----------|
| HPC/PVA/LiClO <sub>4</sub> <sup>a)</sup>                       | 247                 | 1         |
| MMT-PVA <sup>b)</sup>                                          | 13                  | 2         |
| PAMPS/PAAm/ZnCl <sub>2</sub> /NH <sub>4</sub> Cl <sup>c)</sup> | 166                 | 3         |
| PAMPS/PAAm/LiCl <sup>d)</sup>                                  | 290                 | 4         |
| Lig/Gelatin <sup>e)</sup>                                      | 260                 | 5         |
| Starch/PVA/Glycerin/CaCl <sub>2</sub> <sup>f)</sup>            | 254                 | 6         |
| PVA/CNF/ZnSO <sub>4</sub>                                      | 362.7               | This work |

- a) hydroxypropyl cellulose/poly(vinyl alcohol) (HPC/PVA) hydrogel with LiClO<sub>4</sub> water/glycerol mixture solution; b) montmorillonite/poly(vinyl alcohol) (MMT/PVA) hydrogel electrolyte. c) poly (2-acrylamido-2- methylpropane-sulfonic acid)/polyacrylamide (PAMPS/PAAm) double-network matrix and a binary solvent electrolyte system- ethylene glycol/H<sub>2</sub>O (EG/H<sub>2</sub>O with a water content of 10% v/v) containing ZnCl<sub>2</sub>/NH<sub>4</sub>Cl salts. d) PAMPS/PAAm double-network hydrogel soaked from 4 m LiCl/ethylene glycol. e) Lignin-based hydrogels were synthesized by using polyethylene glycol diglycidyl ether (PEGDE) as a macromolecular cross-linking agent through base-catalyzed ring-opening polymerization and cross-linking reaction between phenolic hydroxyl groups in lignin and epoxy group in PEGDE. f) starch/PVA/Glycerin/CaCl<sub>2</sub> (SPGC) organohydrogel.

**Table S3** Comparison of the Capacity of PCD-4 FZHSC at room temperature (25 °C) and -20 °C.

| ZHSC                                                                | Capacity at RT(F/g) | Capacity at -20 °C (F/g) | Ref       |
|---------------------------------------------------------------------|---------------------|--------------------------|-----------|
| PVA/Agar-EMIMBF <sub>4</sub> -Li <sub>2</sub> SO <sub>4</sub> -ZHSC | 28                  | 24.36                    | 7         |
| PAMPS/PAAm-ZHSC                                                     | 43                  | 30.53                    | 4         |
| PVA/ARS/ H <sub>2</sub> SO <sub>4</sub> -ZHSC                       | 86.25               | 66                       | 8         |
| PAAK/CMC-x-ZHSC                                                     | 55                  | 42                       | 9         |
| MMT/PVA/H <sub>2</sub> SO <sub>4</sub> -ZHSC                        | 161                 | 105                      | 2         |
| PVA/MMT/Zn(ClO <sub>4</sub> ) <sub>2</sub> -ZHSC                    | 206                 | 111.24                   | 10        |
| AF PVA-CMC/Zn(CF <sub>3</sub> SO <sub>3</sub> ) <sub>2</sub>        | 158                 | 58.76                    | 11        |
| PAMPS/PAAm/ZnCl <sub>2</sub> /NH <sub>4</sub> Cl                    | 121                 | 55.5                     | 12        |
| PVA/CNF/ZnSO <sub>4</sub> -ZHSC                                     | 208.51              | 135.4                    | This work |

## References

1. N. Lu, R. Na, L. Li, C. Zhang, Z. Chen, S. Zhang, J. Luan and G. Wang, *ACS Appl. Energy Mater.*, 2020, **3**, 1944-1951.
2. C. Lu and X. Chen, *Nano Lett.*, 2020, **20**, 1907-1914.
3. H. Wang, X. Li, D. Jiang, S. Wu, W. Yi, X. Sun and J. Li, *J. Power Sources*, 2022, **52**, 231210.
4. X. Li, D. Lou, H. Wang, X. Sun, J. Li and Y.-N. Liu, *Adv. Funct. Mater.*, 2020, **30**, 2007291.
5. J. Wang, C. Gao, P. Hou, Y. Liu, J. Zhao and P. Huo, *Chem. Eng. J.*, 2023, **455**, 140952.
6. J. Lu, J. Gu, O. Hu, Y. Fu, D. Ye, X. Zhang, Y. Zheng, L. Hou, H. Liu and X. Jiang, *J. Mater. Chem. A*, 2021, **9**, 18406-18420.
7. H. Peng, X. Gao, K. Sun, X. Xie, G. Ma, X. Zhou and Z. Lei, *Chem. Eng. J.*, 2021, **422**, 130353.
8. E. Feng, J. Li, G. Zheng, Z. Yan, X. Li, W. Gao, X. Ma and Z. Yang, *ACS Sustain. Chem. Eng.*, 2021, **9**, 7267-7276.
9. Y. Deng, H. Wang, K. Zhang, J. Shao, J. Qiu, J. Wu, Y. Wu and L. Yan, *Nanoscale*, 2021, **13**, 3010-3018.
10. G. Yang, J. Huang, X. Wan, Y. Zhu, B. Liu, J. Wang, P. Hiralal, O. Fontaine, Y. Guo and H. Zhou, *Nano Energy*, 2021, **90**, 106500.
11. X. Zhu, C. Ji, Q. Meng, H. Mi, Q. Yang, Z. Li, N. Yang and J. Qiu, *Small*, 2022, **18**, 2200055.
12. Z. Li, D. Chen, Y. An, C. Chen, L. Wu, Z. Chen, Y. Sun and X. Zhang, *Energy Storage Mater.*, 2020, **28**, 307-314.
